# Supplementary material for: In Vitro Modeling of the Neurovascular Environment by Coculturing Adult Human Brain Endothelial Cells with Human Neural Stem Cells
Source: PubMed Central journal article supplement (PMC4154686; doi:10.1371/journal.pone.0106346), 2014-09-04
Supplement: pone.0106346.s001.pdf [file pone.0106346.s001.pdf]

| Component                            | EC           | NSC             | EC/NSC                     | Supplier      | Cat. Ref.  |
|--------------------------------------|--------------|-----------------|----------------------------|---------------|------------|
| DMEM:F12                             |              | Basal medium    | Basal medium (half volume) | Sigma-Aldrich | D6421      |
| EBM-2                                | Basal medium |                 | Basal medium (half volume) | Lonza         | CC-3156    |
| Fetal bovine serum                   | 5%           |                 |                            | PAA           | A15-151    |
| Hydrocortisone                       | 1.4 $\mu$ M  |                 | 0.7 $\mu$ M                | Sigma-Aldrich | H-0135     |
| Acid ascorbic                        | 5 $\mu$ g/ml |                 | 2.5 $\mu$ g/ml             | Sigma-Aldrich | A4544      |
| Chemically defined lipid concentrate | 1%           |                 | 0.5%                       | Invitrogen    | 11905-031  |
| HEPES                                | 10 mM        |                 | 5 mM                       | Sigma-Aldrich | 83264      |
| Penicillin/ Streptomycin             | 1%           |                 | 0.5%                       | Invitrogen    | 15140-122  |
| Human albumin solution               |              |                 | 0.03%                      | 0.015%        | GemBio     |
| Transferrin, human                   |              | 100 $\mu$ g/ml  | 50 $\mu$ g/ml              | Sigma-Aldrich | T1147      |
| Putrescine DiHCl                     |              | 16.2 $\mu$ g/ml | 8.1 $\mu$ g/ml             | Sigma-Aldrich | P5780      |
| Insulin, human                       |              | 5 $\mu$ g/ml    | 2.5 $\mu$ g/ml             | Sigma-Aldrich | I9278      |
| Progesterone                         |              | 60 ng/ml        | 30 ng/ml                   | Sigma-Aldrich | P8783      |
| L-glutamine                          |              | 2 mM            | 1 mM                       | Sigma-Aldrich | G7513      |
| Sodium selenite                      |              | 40 ng/ml        | 20 ng/ml                   | Sigma-Aldrich | S9133      |
| L-thyroxine (T4)                     |              | 400 ng/ml       | 200 ng/ml                  | Sigma-Aldrich | T0397      |
| Tri-iodo-thyronine (T3)              |              | 337 ng/ml       | 118.5 ng/ml                | Sigma-Aldrich | T6397      |
| Heparin sodium                       |              | 10 Units/ml     | 5 Units/ml                 | Sigma-Aldrich | H3149      |
| Corticosterone                       |              | 40 ng/ml        | 20 ng/ml                   | Sigma-Aldrich | C2505      |
| *bFGF                                |              | 10 ng/ml        |                            | PeptoTech     | AF-100-18B |
| *EGF                                 |              | 20 ng/ml        |                            | PeptoTech     | AF-100-15  |
| *4-hydroxytamoxifen                  |              | 100 nM          |                            | Sigma-Aldrich | H7904      |

**Table S1. Composition of culture media.** Composition of the cell culture media for growing the D3 human cerebral microvascular endothelial cell (hCMEC) line, the STROC05 human neural stem cell (hNSC) line, and the hCMEC/hNSC coculture. Factors with a \* were removed to induce cell differentiation.
